# Supplementary material
Source: PubMed Central journal article supplement (PMC9477183)
Supplement: NIHMS1828704-supplement-5.pdf [file NIHMS1828704-supplement-5.pdf]

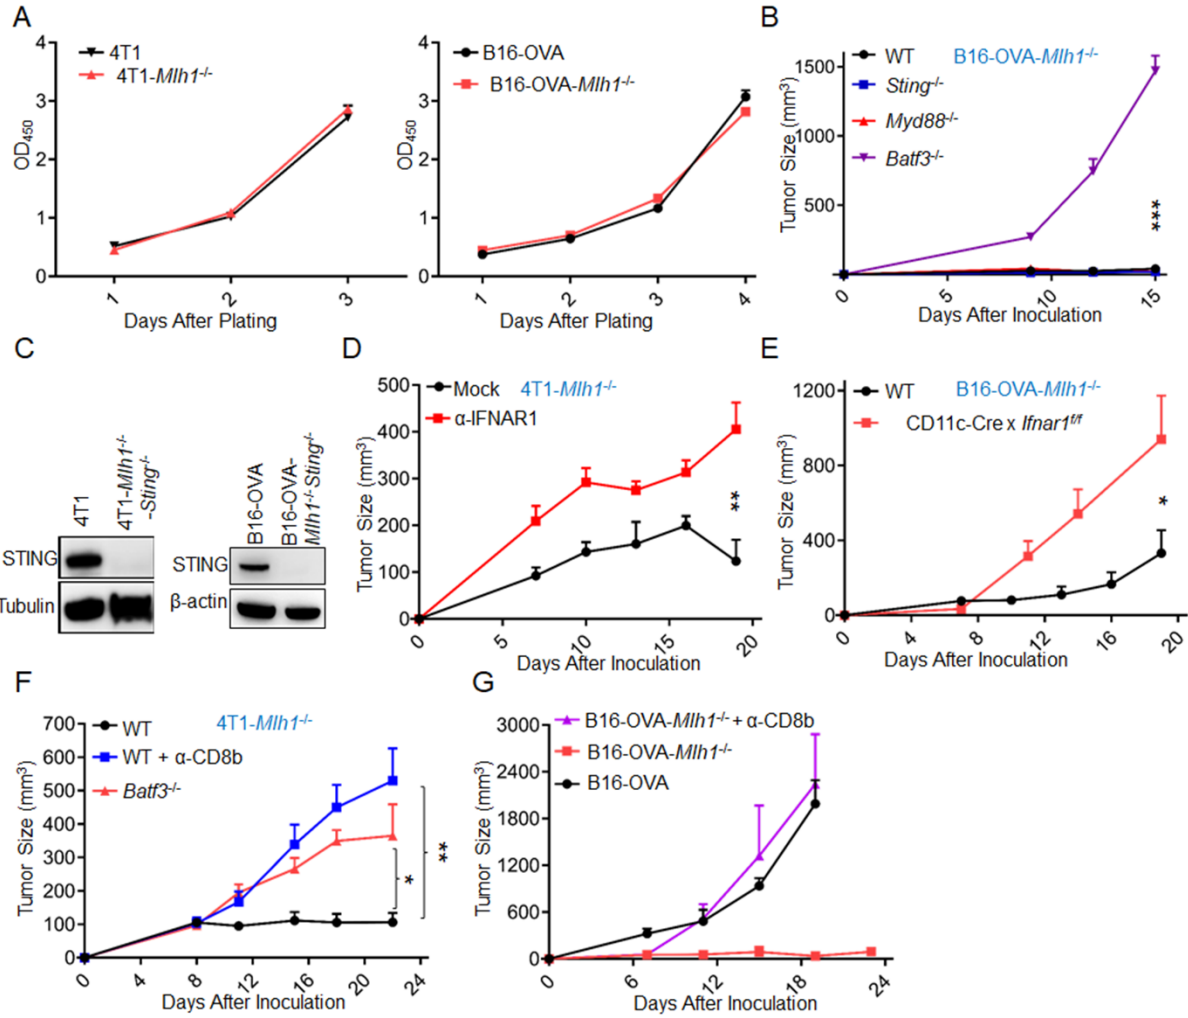

**Figure S1. Host IFNAR1 pathway is essential for dMLH1 tumor progression, Related to Figure 1**

(A) 4T1 and 4T1-*Mlh1*<sup>-/-</sup> cells, B16-OVA and B16-OVA-*Mlh1*<sup>-/-</sup> cells, were inoculated into 96-well plate and cultured for different days. Cell proliferation rate was determined by the Cell Counting Kit-8.

(B) B16-OVA cells ( $5 \times 10^5$  cells/mouse) with dMLH1 (D166) were subcutaneously inoculated into WT, *MyD88*<sup>-/-</sup>, *Sting*<sup>-/-</sup> and *Batf3*<sup>-/-</sup> mice (n=5).

(C) *Sting* were knocked out in 4T1-*Mlh1*<sup>-/-</sup> cells and B16-OVA-*Mlh1*<sup>-/-</sup> cells.

(D) 4T1 cells with dMLH1 (D166) were inoculated into WT BALB/C mice (n=5), with or without 200 µg of anti-IFNAR1 mAb at days 0, 3 and 6 after inoculation.

(E) B16-OVA cells with dMLH1 (D170) were inoculated into WT and CD11c-Cre; *Ifnar1*<sup>fl/fl</sup> mice (n=4). (F) 4T1 cells with dMLH1 (D165) were inoculated into *Batf3*<sup>-/-</sup> mice (n=5) or WT BALB/C mice (n=5) with or without 200 µg of anti-CD8b mAb at days 0, 3, 7, and 10 after inoculation.

(G) B16-OVA and B16-OVA-*Mlh1*<sup>-/-</sup> cells were inoculated into WT BALB/C mice (n=5-7) at  $5 \times 10^5$  cells/mouse. Mice were depleted of T cells at day 0 and 5 after inoculation with 200 µg/mouse anti-CD8b mAb. The differences of tumor size at day 19 between B16-OVA and T-cell depleted B16-OVA-*Mlh1*<sup>-/-</sup> group were not significant (p=0.7005).

Unpaired t test was used to determine significance.

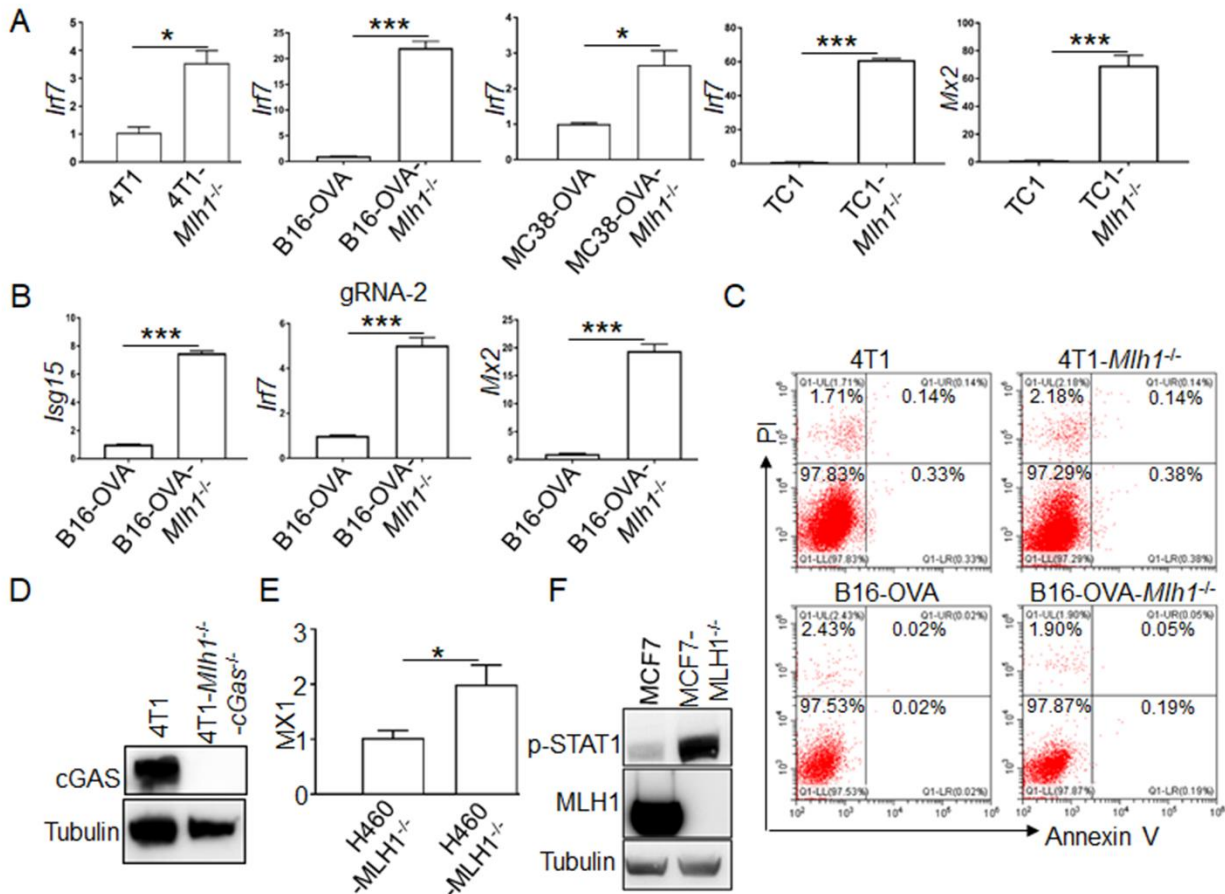

**Figure S2. Activation of type I IFN signal pathway in dMLH1 tumor cell lines, Related to Figure 2**

(A) ISGs expression at mRNA level were determined in different mouse tumor cell lines.

(B) *Mlh1* gene was knocked out in B16-OVA cells with another set of gRNAs, and ISGs expression were determined.

(C) 4T1 and 4T1-*Mlh1*<sup>-/-</sup> cells, B16-OVA and B16-OVA-*Mlh1*<sup>-/-</sup> cells, were cultured in vitro for 2 days, then digested and stained with propidium iodide (PI) and Annexin V.

(D) *cGAS* was knocked out in 4T1-*Mlh1*<sup>-/-</sup> cells, western blots data were shown.

(E and F) MX1 expression and phosphorylation of STAT1 at Y701 were determined in human cancer cell lines H460 and MCF7.

Unpaired t test was used to determine significance.

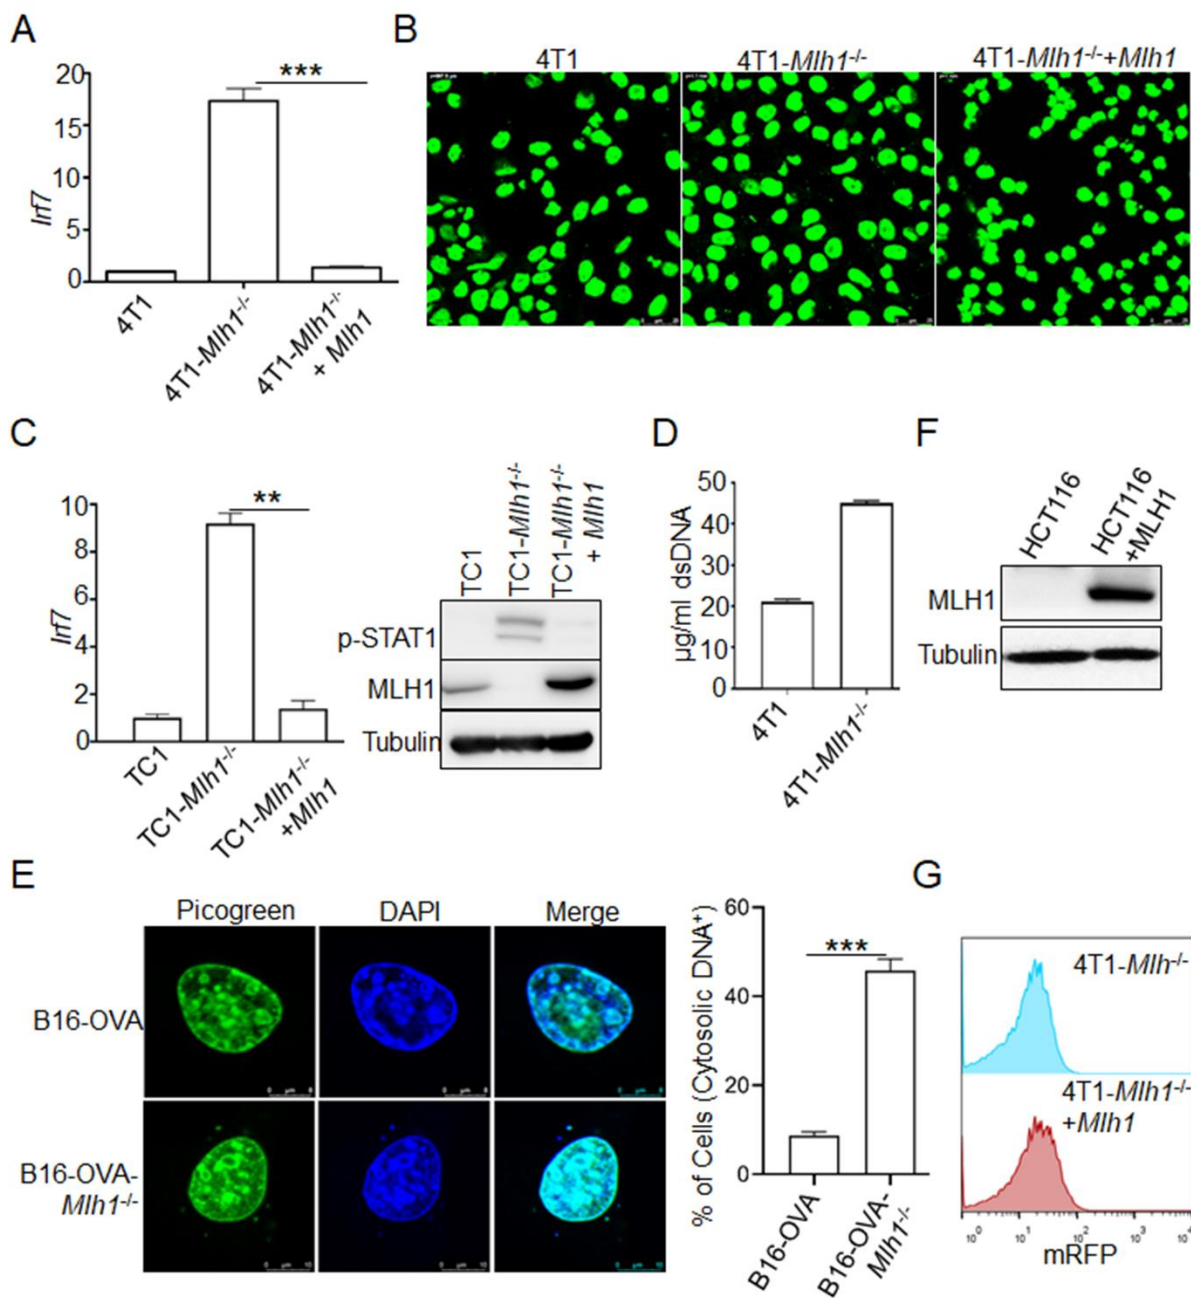

**Figure S3. MLH1 regulates accumulation of cytosolic DNA in tumor cells and immunotherapy in vivo, Related to Figure 3**

(A) *Irf7* expression at mRNA level was determined in MLH1-rescued cells.

(B) dsDNA was stained by PicoGreen reagents in MLH1-rescued cells.

(C) *Irf7* and phosphorylation of STAT1 at Y701 expression at mRNA level were determined in MLH1-rescued cells.

(D) Cytosolic fractionation was isolated by ultracentrifugation, and dsDNA was absolutely quantified by PicoGreen dsDNA quantification fluorescence method.

(E) dsDNA in B16-OVA cells was stained using PicoGreen reagents. Extra-nuclear dsDNA was counted, and statistical data are shown.

(F) MLH1 expression is shown in HCT116 cells.

(G) 4T1-*Mlh1*<sup>-/-</sup> cells were infected with lentivirus expressing either MLH1-IRES-mRFP or mRFP alone. mRFP positive cells were sorted, and mRFP level was shown by FACS.

Unpaired t test was used to determine significance.

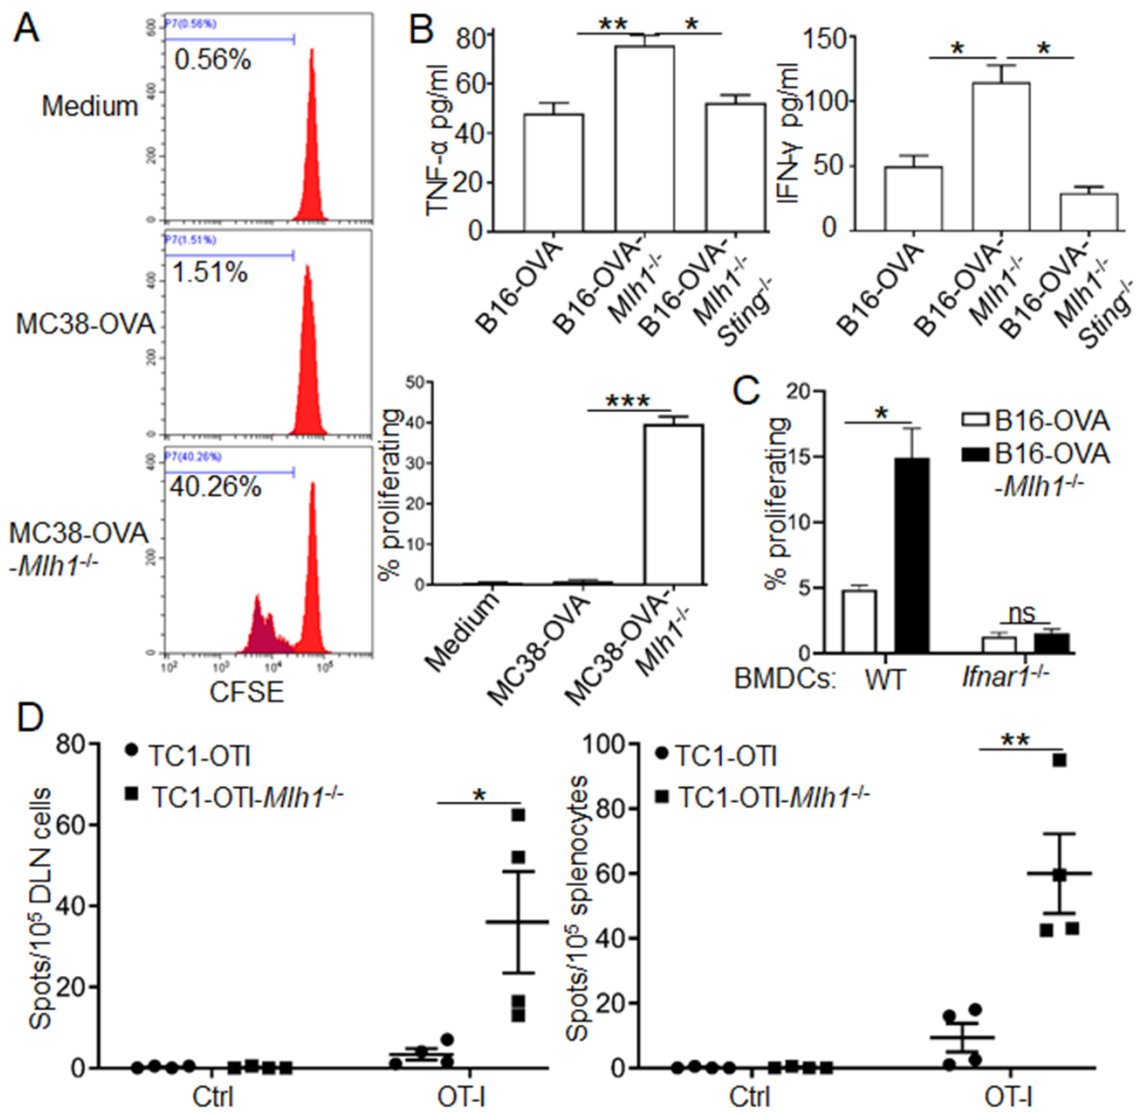

**Figure S4. T cells respond better to specific antigen in dMLH1 tumor cells, Related to Figure 4**

(A) Like in Figure 4A, here the ratio of DC: T is 1:20.

(B) Like in Figure 4A. After over-night co-culture with indicated tumor cells, BMDCs were isolated and added into a 96-well plate together with purified CFSE-labelled OT-I T cells for 2 days, then IFN- $\gamma$  and TNF- $\alpha$  in supernatant were quantified by Cytometric Bead Array. Statistical data are shown.

(C) BMDCs (WT mice and *Ifnar1*-deficient mice) pre-educated with B16-OVA cells and B16-OVA-*Mlh1*<sup>-/-</sup> cells were purified and co-cultured with purified OT-I T cells, then T-cell proliferation was determined 3 days later by FACS.

(D) TC1-OTI cells were inoculated into WT C57BL/6 mice (n=4). One week later, cells from spleen and draining lymph nodes were isolated and re-stimulated by OT-I peptide or control SIY peptide in vitro, T cell responses were determined by IFN- $\gamma$  ELISPOT assay. Statistical data are shown.

Unpaired t test was used to determine significance of differences.

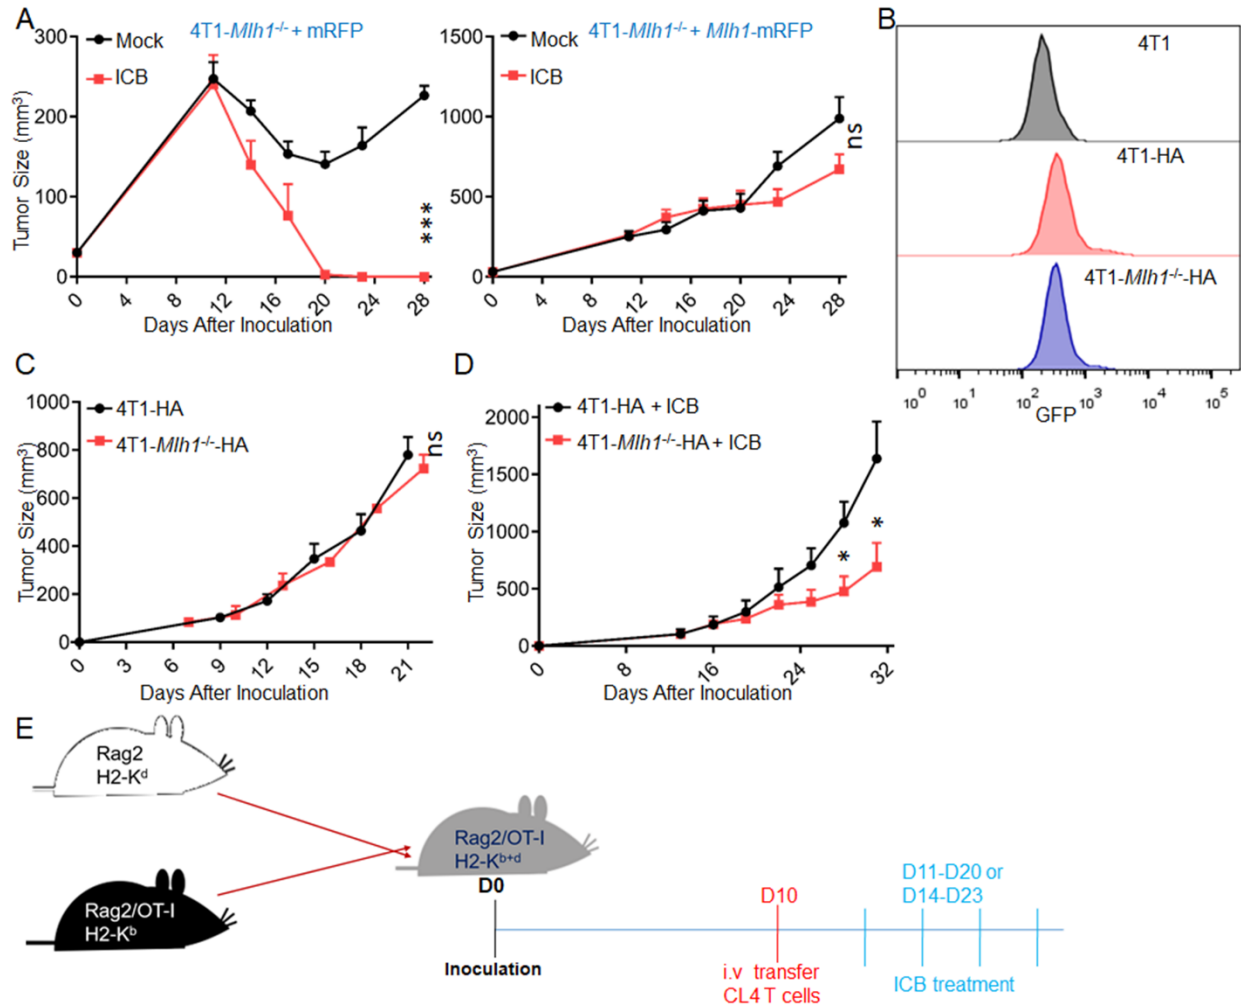

**Figure S5. 4T1-HA model construction, Related to Figure 5**

(A) Fragmented tumor tissues derived from 4T1-*Mlh1*<sup>-/-</sup> and 4T1-*Mlh1*<sup>-/-</sup>+MLH1 cells in Rag1 mice were implanted into WT mice (n=4-5), and treated with ICB drugs at day 11, 14 and 17. Tumor curves are shown. \*\*\*p<0.0001 between the two groups in 4T1-MLH1<sup>-/-</sup> model; ns, P=0.0866 between the groups in 4T1-*Mlh1*<sup>-/-</sup>+MLH1 model.

(B) 4T1 and 4T1-*Mlh1*<sup>-/-</sup> cells were infected by lentivirus expressing HA-GFP fusion protein. GFP positive cells were sorted, and GFP level was shown by FACS.

(C) Cell lines in (B) were inoculated into F1 mice of Rag2×Rag2/OT-I to compare in vivo growth without treatment. No significant differences were found.

(D) 4T1-HA and 4T1-HA-*Mlh1*<sup>-/-</sup> cells were inoculated into F1 mice (n=5-7) of Rag2×Rag2/OT-I mice, followed by CL4 T-cell transfer at day 14 and ICB treatment at day 18, 21 and 24. \*P=0.0364 at day 28, \*P=0.0419 at day 31 between the two groups.

(E) Schematic diagram showing ICB treatment in 4T1-HA model.

Unpaired t test was used to determine significance of differences.



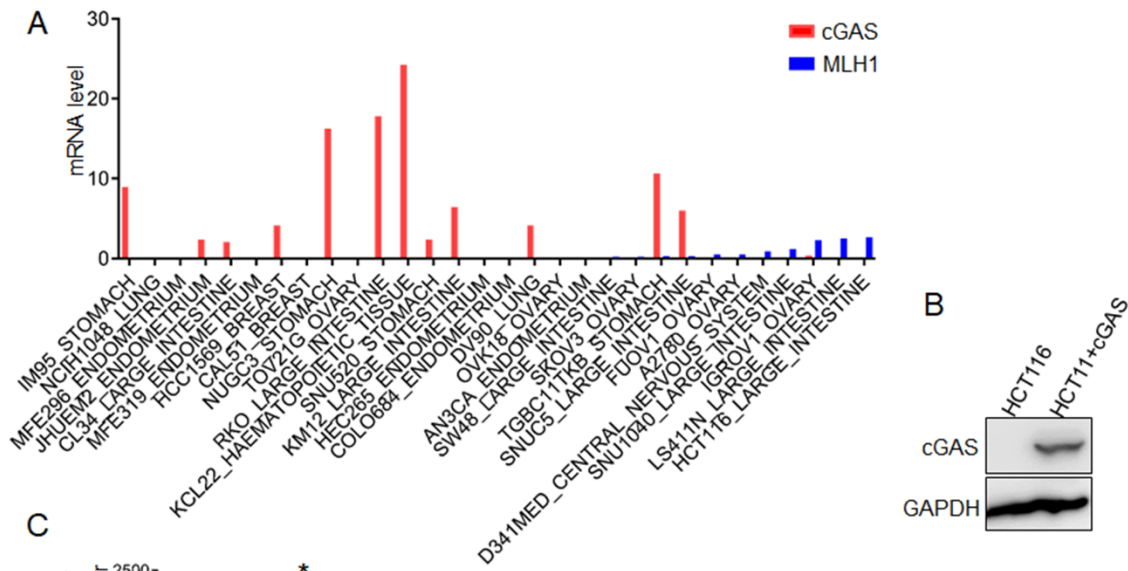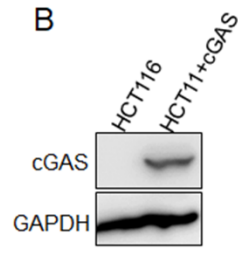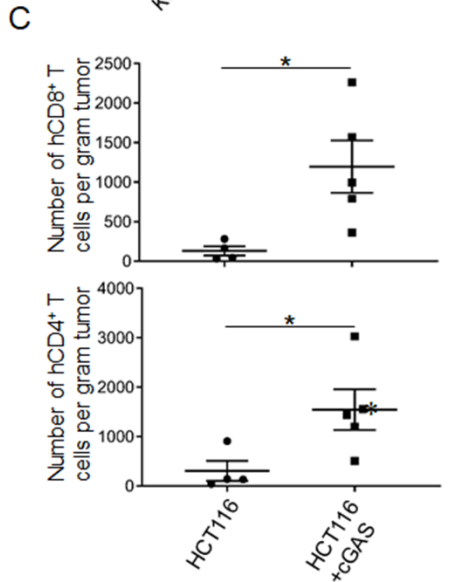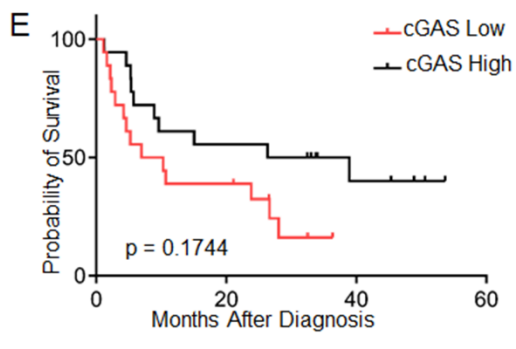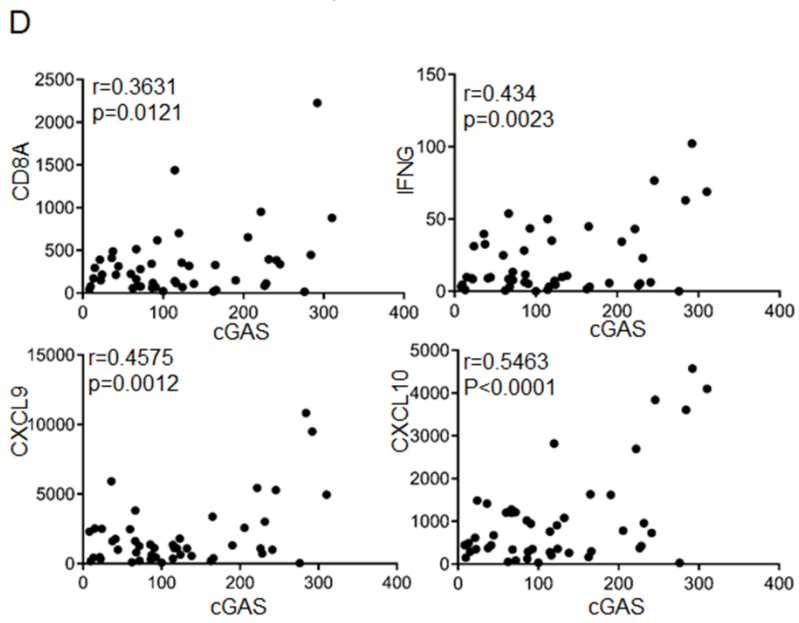

**Figure S6. cGAS expression correlates with tumor-infiltration of CD8<sup>+</sup> T cells in MSI tumors, Related to Figure 6**

(A) The mRNA level of cGAS is shown among a list of human dMLH1 cancer cell lines.

(B) Human cGAS expression is shown in HCT116 cells.

(C) HCT116 and HCT116+cGAS cells were inoculated into human immune cell chimeric mice (n=4-5). One week later, tumor-infiltrated CD8<sup>+</sup> and CD4<sup>+</sup> T cells were detected by FACS.

(D) Correlation analysis of cGAS expression level with the expression level of CD8A, IFNG, CXCL9 and CXCL10, respectively, in MSI-H human colorectal adenocarcinoma ([see Table S2 for patient information](#)).

(E) The curves between cGAS expression with overall survival in melanoma patients (n=17-18) treated with ipilimumab are shown ([see Table S3 for patient information](#)).

Unpaired t test was used to determine significance of differences in C. The log-rank test for E. Pearson correlation coefficient (two-tailed) was performed to determine the correlation in D.
